# Supplementary material
Source: PubMed Central journal article supplement (PMC4136302)
Supplement: JVI.01277-14_zjv999099419so1.pdf [file JVI.01277-14_zjv999099419so1.pdf]

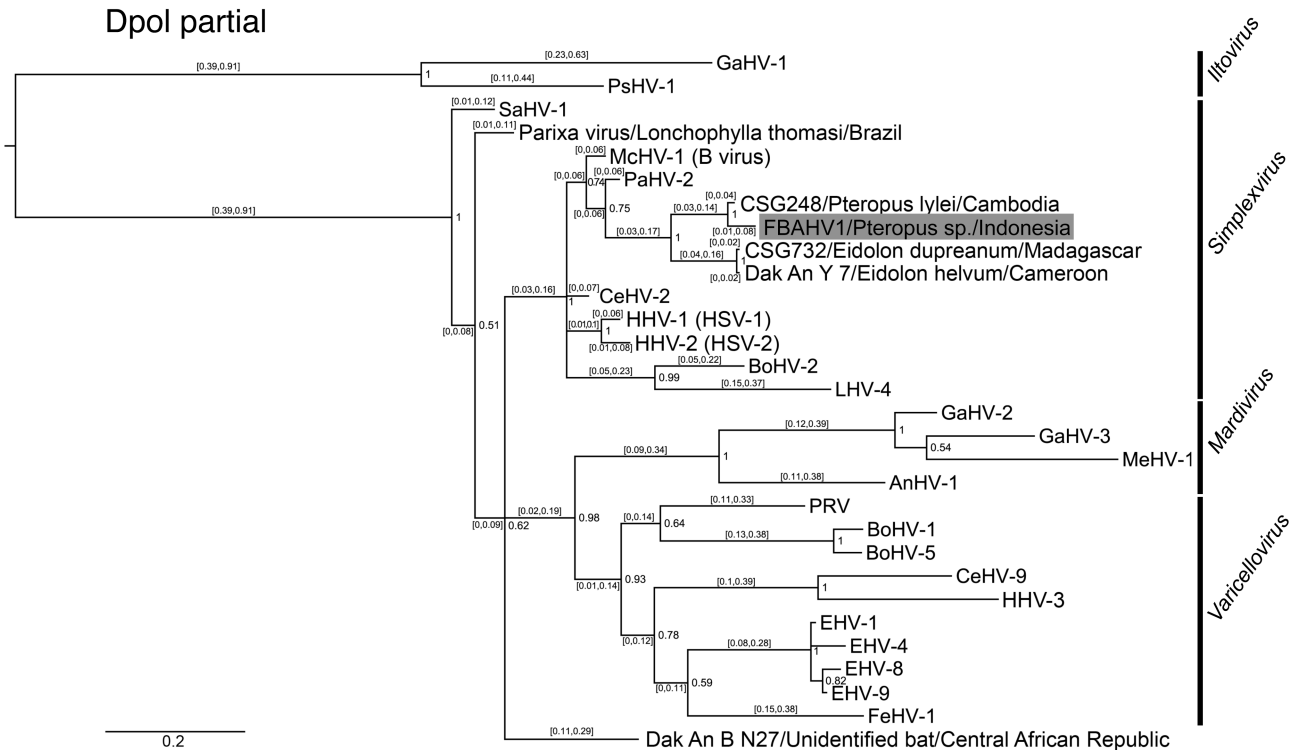

**Fig. S1. Bayesian phylogenetic tree based on partial amino acid sequences of the *UL30* product.**

Trees were constructed based on the deduced partial amino acid sequences (155 amino acids) of viral DNA polymerase (Dpol), which is encoded by *UL30* in simplex viruses. The WAG amino acid substitution model was used. Bayesian posterior probabilities are indicated at each tree root. The branch labels represent the 95% highest posterior density interval of the substitution rate. The scale bar represents a distance of 0.2 substitutions per site. FBAHV1 is shaded grey. The abbreviated virus names and the accession numbers of the sequences used for the analysis are shown in Table S1.

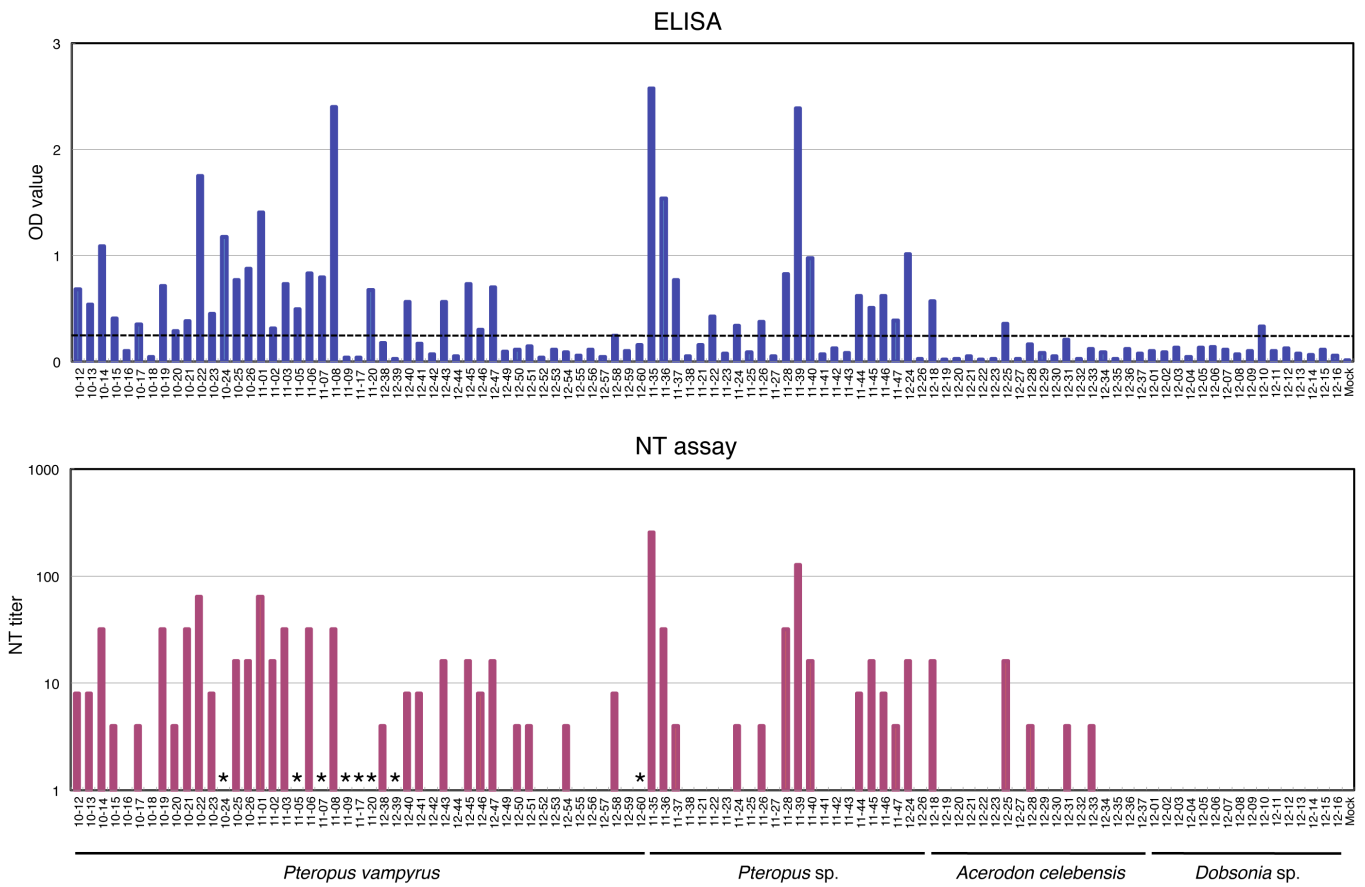

**Fig. S2. FBAHV1-specific antibodies detected in sera collected from Indonesian fruit bats.** The upper graph shows the result of the FBAHV1 ELISA. The horizontal dashed line indicates the cutoff value, which was set at an OD of 0.23. The lower graph shows the results of the virus neutralization test. Asterisks indicate samples removed from the analysis because they were either cytotoxic or of insufficient volume.

**Table S1. Viruses used for phylogenetic analysis**

| Genus                 | Name                                | Abbreviation     | Accession Number (Dpol / gG) |
|-----------------------|-------------------------------------|------------------|------------------------------|
| <i>Simplexvirus</i>   | Cercopithecine herpesvirus 2        | CeHV-2           | YP_164473/YP_164506          |
|                       | Herpes simplex virus type 1         | HHV-1 (HSV-1)    | NP_044632/NP_044666          |
|                       | Herpes simplex virus type 2         | HHV-2 (HSV-2)    | NP_044500/NP_044534          |
|                       | Macacine herpesvirus 1              | McHV-1 (B virus) | NP_851890/NP_851923          |
|                       | Papiine herpesvirus 2               | PaHV-2           | YP_443877/YP_443910          |
|                       | Saimiriine herpesvirus 1            | SaHV-1           | YP_003933809/YP_003933846    |
|                       | Bat simplexvirus 1                  | Dak An B N27     | ACJ02393/–                   |
|                       | Eidolon dupraenum simplexvirus 1    | CS732G           | ACJ02384/–                   |
|                       | Eidolon helvum simplexvirus 1       | Dak An Y 7       | ACJ02395/–                   |
|                       | Lonchophylla thomasi simplexvirus 1 | Parixa virus     | ACJ02392/–                   |
|                       | Pteropus lylei simplexvirus 1       | CSG248           | ACJ02382/–                   |
|                       | Bovine herpesvirus 2                | BoHV-2           | AAD55134/AAD45608            |
|                       | Leporid herpesvirus 4               | LHV-4            | AFR32472/AFR32506            |
|                       | Macropodid herpesvirus 2            | MaHV-2           | –/AAL13142                   |
| <i>Varicellovirus</i> | Bovine herpesvirus 1                | BoHV-1           | NP_045328/NP_045369          |
|                       | Bovine herpesvirus 5                | BoHV-5           | YP_003662494/YP_003662532    |
|                       | Cercopithecine herpesvirus 9        | CeHV-9           | NP_077443/–                  |
|                       | Equid herpesvirus 1                 | EHV-1            | YP_053075/YP_053114          |
|                       | Equid herpesvirus 4                 | EHV-4            | NP_045247/NP_045287          |
|                       | Equid herpesvirus 8                 | EHV-8            | YP_006273050/YP_006273009    |
|                       | Equid herpesvirus 9                 | EHV-9            | YP_002333511/YP_002333551    |
|                       | Felid herpesvirus 1                 | FeHV-1           | YP_003331549/YP_003331588    |
|                       | Suid herpesvirus 1                  | SuHV-1           | YP_068333/YP_068386          |
|                       | Human herpesvirus 3                 | HHV-3            | NP_040151/–                  |
| <i>Mardivirus</i>     | Anatid herpesvirus 1                | AnHV-1           | YP_003084391/YP_003084432    |
|                       | Gallid herpesvirus 2                | GaHV-2           | YP_001033959/–               |
|                       | Gallid herpesvirus 3                | GaHV-3           | NP_066862/–                  |
|                       | Meleagrid herpesvirus 1             | MeHV-1           | NP_073324/–                  |
| <i>Iltovirus</i>      | Gallid herpesvirus 1                | GaHV-1           | YP_182359/YP_182403          |
|                       | Psittacid herpesvirus 1             | PshV-1           | NP_944403/NP_944446          |

The Dpol ORF of MaHV-2 has not yet been sequenced. The gG ORF was absent from the genomes of HHV-3, CeHV-9, GaHV-2, GaHV-3, and MeHV-1. This ORF has not yet been sequenced in the Dak An B N27, CS732G, Dak An Y 7, Parixa virus, or CSG248 genomes.
